# Supplementary material for: Prevalence of Past Homelessness, Mental Health and Health Risk Behaviours Among Sexual Minority Young People in the UK: Insights from the Millenium Cohort Study
Source: Research Square preprint supplement (doi:10.21203/rs.3.rs-7101395/v1), 2025-07-30
Supplement: Supplementary file 1 [file 45538c4bbf71753abde75115.docx]

**Supplemental Table 1. The original categories for sexual and ethnic-identity variables that were combined for analysis**

| **Original categories** | **N (%)** | **Collapsed for analysis** | **Final N (%)** |
| --- | --- | --- | --- |
| **Ethnicity** |  |  |  |
| White | 7,920 (81) | **White** | **7,920 (81)** |
| Mixed | 290 (3) |  |  |
| Indian | 287 (2.9) |  |  |
| Pakistani | 537 (5.5) |  |  |
| Bangladeshi | 243 (2.4) | **Ethnic minority** | **1,869 (19)** |
| Black Caribbean | 108 (1.1) |  |  |
| Black African | 219 (2.2) |  |  |
| ‘Other’ ethnic group | 185 (1.9) |  |  |
|  |  |  |  |
| **Sexual identity** |  |  | **Used in main analysis** |
| Completely heterosexual/ straight | 7,809 (78.5) | **Heterosexual** | **7,809 (89)** |
| Mainly heterosexual/ straight | 1,084 (10.9) |  |  |
| Bisexual | 649 (6.5) |  |  |
| Mainly gay or lesbian | 90 (0.9) | **Sexual minority** | **896 (11)** |
| Completely gay or lesbian | 157 (1.6) |  |  |
| Other (not included) | 154 (1.6) |  |  |
|  |  |  |  |

**Supplemental Table 2. A detailed description of health and wellbeing outcomes, and health-related behaviours assessed at the age 17 sweep of the Millennium Cohort Study**

| **Outcome** | **Question(s) in cohort member computer-assisted personal interview (CAPI), self-completion interview (CASI) or online questionnaire (CAWI)** | **Binary or continuous** | **Comments** |
| --- | --- | --- | --- |
| **Mental health and general health** |  |  |  |
| General health description | How would you describe your health generally? Would you say it is: | Excellent/very good/good vs fair/poor |  |
| Self-reported Strengths and Difficulties Questionnaire (SDQ)  -emotional subscale | Complains of headaches/stomach aches/sickness  Often seems worried  Often unhappy  Nervous or clingy in new situations  Many fears, easily scared. | Continuous | 1. Not true  2. Somewhat true  3. Certainly true. |
| Attempted suicide | Have you ever hurt yourself on purpose in an attempt to end your life? | No vs yes |  |
| Doctor diagnosed depression | Has a doctor ever told you that you suffer from depression or serious anxiety? | No vs yes |  |
| Victimisation | In the past 12 months has anyone done any of these things to you?  Insulted/physical/hit/harassed/assaulted you. | No vs yes (any kind of victimisation) |  |
| Self-harm | During the last year, have you hurt yourself on purpose in any of the following ways?  Cut or stabbed yourself  Burned yourself  Bruised or pinched yourself  Taken an overdose of tablets  Pulled out your hair  Hurt yourself some other way | No vs yes (any kind of self-harm) |  |
| Sleep quality | During the past month, how would you rate your sleep quality overall? Would you say it has been…  1 …Very good  2 …Fairly good  3 …Fairly bad, or  4 …Very bad? | Very good/fairly good vs fairly bad/very bad |  |
| **Health and risk behaviours** |  |  |  |
| Frequency of alcohol consumption | How many times have you had an alcoholic drink in the last 12 months? | <5 times vs >5times |  |
| Frequency of cannabis use | In the past year how many times have you taken cannabis? | <4 times vs >4 times |  |
| Risky sex (use of contraception) | Do you or any partner regularly use any of these forms of contraception or protection when having sex together? | No vs yes |  |
| Exercise in previous week | On how many days in the last week did you do a total of at least an hour of moderate to vigorous physical activity?  By moderate to vigorous we mean any physical activity that makes you get warmer, breathe harder and makes your heartbeat faster, e.g., riding a bike, running, playing football, swimming, dancing, etc. | None vs. any amount |  |
| Antisocial behaviour | Any antisocial behaviour in previous 12 months:  Pushed or shoved/hit/slapped/punched someone?  Hit someone with or used a weapon?  Stolen something from someone. e.g. a mobile phone, money etc.?  Harassed or bothered someone via mobile phone or email?  Sent pictures or spread rumours about someone via phone, email, social media or online?  Made an unwelcome sexual approach or assaulted someone sexually? | Yes or no |  |

**Supplemental Table 3. Associations between past homelessness and mental health in 10,223 adolescents aged 17 years from the Millennium Cohort Study**

|  | **SDQ** | | **Doctor diagnosed depression** | | **Self-harm** | | **Attempted suicide** | | **General health** | | **Sleep quality** | |
| --- | --- | --- | --- | --- | --- | --- | --- | --- | --- | --- | --- | --- |
|  | **OR** | **95% CI** | **OR** | **95% CI** | **OR** | **95% CI** | **OR** | **95% CI** | **OR** | **95% CI** | **OR** | **95% CI** |
| **Past homelessness** |  |  |  |  |  |  |  |  |  |  |  |  |
| No | 1 |  | 1 |  | 1 |  | 1 |  | 1 |  | 1 |  |
| Yes | 3.24 | 1.91,5.51 | 4.45 | 2.19,9.07 | 2.9 | 1.54,5.44 | 5.26 | 2.49,11.14 | 4.75 | 2.38,9.49 | 3.17 | 1.37,7.37 |
| **Sexual identity** |  |  |  |  |  |  |  |  |  |  |  |  |
| Heterosexual | 1 |  | 1 |  | 1 |  | 1 |  | 1 |  | 1 |  |
| Mainly heterosexual | 1.92 | 1.60,2.31 | 1.69 | 1.34,2.13 | 2.5 | 2.11,2.96 | 1.83 | 1.37,2.45 | 1.79 | 1.37,2.34 | 1.44 | 1.21,1.72 |
| Bisexual/gay/lesbian | 3.06 | 2.60,3.59 | 3.39 | 2.82,4.07 | 5.67 | 4.67,6.89 | 4.05 | 3.12,5.24 | 2.14 | 1.65,2.77 | 1.82 | 1.54,2.16 |
| ***Interaction terms*** |  |  |  |  |  |  |  |  |  |  |  |  |
| homelessness **X** mainly heterosexual | 0.24 | 0.03,1.70 | 2.5 | 0.38,16.56 | 0.45 | 0.09,2.27 | 0.04 | 0.00,0.57 | 2.71 | 0.57,12.85 | 0.22 | 0.03,1.58 |
| homelessness **X** bisexual/gay/lesbian | 0.43 | 0.15,1.26 | 0.55 | 0.15,1.98 | 1.65 | 0.41,6.69 | 1.02 | 0.24,4.27 | 0.61 | 0.16,2.28 | 1.91 | 0.18,20.64 |
| **Sex at birth** |  |  |  |  |  |  |  |  |  |  |  |  |
| Males | 1 |  | 1 |  | 1 |  | 1 |  | 1 |  | 1 |  |
| Female | 3.54 | 3.10,4.04 | 2.15 | 1.83,2.53 | 1.63 | 1.43,1.85 | 2.07 | 1.68,2.55 | 1.16 | 0.96,1.39 | 1.1 | 0.98,1.24 |
| **Ethnicity** |  |  |  |  |  |  |  |  |  |  |  |  |
| White | 1 |  | 1 |  | 1 |  | 1 |  | 1 |  | 1 |  |
| Ethnic-minority | 0.58 | 0.48,0.70 | 0.43 | 0.32,0.56 | 0.64 | 0.52,0.78 | 0.6 | 0.46,0.78 | 1.01 | 0.80,1.29 | 0.93 | 0.78,1.11 |
| **Parental income** |  |  |  |  |  |  |  |  |  |  |  |  |
| Quintile 1 | 1.22 | 1.03,1.45 | 1.76 | 1.42,2.19 | 1.27 | 1.06,1.51 | 2.75 | 2.15,3.52 | 2.51 | 1.97,3.21 | 1.36 | 1.13,1.64 |
| Quintile 2 | 1.24 | 1.05,1.46 | 1.45 | 1.16,1.81 | 1.24 | 1.06,1.45 | 2.18 | 1.69,2.82 | 1.67 | 1.28,2.16 | 1.31 | 1.12,1.54 |
| Quintile 3 | 1.23 | 1.06,1.44 | 1.42 | 1.16,1.74 | 1.05 | 0.92,1.20 | 1.35 | 1.00,1.81 | 1.37 | 1.01,1.85 | 1.25 | 1.07,1.48 |
| Quintiles 4 & 5 (most advantaged) | 1 |  | 1 |  | 1 |  | 1 |  | 1 |  | 1 |  |

**Supplemental Table 4. Associations between past homelessness and health-risk behaviours in 10,223 adolescents aged 17 years from the Millennium Cohort Study**

|  | **Alcohol frequency** | | **Weed frequency** | | **Regular smoking** | | **Exercise** | | **Risky sex** | | **Anti-social behaviour** | |
| --- | --- | --- | --- | --- | --- | --- | --- | --- | --- | --- | --- | --- |
| **Past homelessness** | **OR** | **95% CI** | **OR** | **95% CI** | **OR** | **95% CI** | **OR** | **95% CI** | **OR** | **95% CI** | **OR** | **95% CI** |
| No | 1 |  | 1 |  | 1 |  | 1 |  | 1 |  | 1 |  |
| Yes | 0.41 | 0.16,1.09 | 1.45 | 0.58,3.61 | 3.11 | 1.53,6.32 | 1.42 | 0.75,2.68 | 2.13 | 1.18,3.83 | 0.92 | 0.47,1.79 |
| **Sexual identity** |  |  |  |  |  |  |  |  |  |  |  |  |
| Heterosexual | 1 |  | 1 |  | 1 |  | 1 |  | 1 |  | 1 |  |
| Mainly heterosexual | 1.16 | 0.98,1.38 | 1.59 | 1.23,2.06 | 1 | 0.79,1.27 | 1.1 | 0.92,1.32 | 1.11 | 0.90,1.36 | 1.4 | 1.17,1.69 |
| Bisexual/gay/lesbian | 1.06 | 0.87,1.30 | 1.66 | 1.27,2.18 | 1.6 | 1.28,2.00 | 1.53 | 1.25,1.86 | 1.32 | 1.09,1.59 | 1.27 | 1.06,1.53 |
| ***Interaction terms*** |  |  |  |  |  |  |  |  |  |  |  |  |
| homelessness **X** mainly heterosexual | 4.54 | 0.74,27.98 | 1.85 | 0.17,20.52 | 0.61 | 0.11,3.39 | 0.29 | 0.05,1.60 | 1.96 | 0.46,8.31 | 5.13 | 1.18,22.26 |
| homelessness **X** bisexual/gay/lesbian | 4.64 | 0.89,24.11 | 2.01 | 0.39,10.48 | 1.72 | 0.48,6.09 | 0.65 | 0.19,2.16 | 1.09 | 0.30,4.02 | 4.03 | 1.23,13.19 |
| **Sex at birth** |  |  |  |  |  |  |  |  |  |  |  |  |
| Males | 1 |  | 1 |  | 1 |  | 1 |  | 1 |  | 1 |  |
| Female | 0.8 | 0.71,0.89 | 0.41 | 0.34,0.49 | 0.94 | 0.81,1.10 | 1.85 | 1.66,2.06 | 1.02 | 0.90,1.17 | 0.34 | 0.30,0.38 |
| **Ethnicity** |  |  |  |  |  |  |  |  |  |  |  |  |
| White | 1 |  | 1 |  | 1 |  | 1 |  | 1 |  | 1 |  |
| Ethnic-minority | 0.26 | 0.19,0.36 | 0.71 | 0.53,0.95 | 0.27 | 0.20,0.36 | 1.14 | 0.96,1.34 | 0.36 | 0.27,0.47 | 1.09 | 0.93,1.27 |
| **Parental income** |  |  |  |  |  |  |  |  |  |  |  |  |
| Quintile 1 | 0.4 | 0.33,0.48 | 1.06 | 0.81,1.40 | 2.89 | 2.37,3.53 | 1.89 | 1.61,2.23 | 1.32 | 1.10,1.58 | 1.02 | 0.86,1.22 |
| Quintile 2 | 0.59 | 0.49,0.71 | 1.17 | 0.91,1.50 | 2.23 | 1.83,2.72 | 1.75 | 1.49,2.06 | 1.24 | 1.06,1.45 | 1.03 | 0.88,1.21 |
| Quintile 3 | 0.7 | 0.60,0.82 | 0.98 | 0.79,1.22 | 1.34 | 1.08,1.65 | 1.35 | 1.14,1.60 | 1.19 | 1.02,1.39 | 0.92 | 0.79,1.07 |
| Quintiles 4 & 5 (most advantaged) | 1 |  | 1 |  | 1 |  | 1 |  | 1 |  | 1 |  |
